# Supplementary material for: Law Enforcement and Clinician Partnerships: Training of Trainers for CIT Teams in Liberia, West Africa
Source: Atypon-hosted journal article supplement (doi:10.1176/appi.ps.201800510), 2019-06-12
Supplement: appi.ps.201800510.ds001.pdf [file appi.ps.201800510.ds001.pdf]

 


Psychiatry Online
