# Supplementary material for: Law Enforcement and Clinician Partnerships: Training of Trainers for CIT Teams in Liberia, West Africa
Source: Atypon-hosted journal article supplement (doi:10.1176/appi.ps.201800510), 2019-06-12
Supplement: appi.ps.201800510.ds001.pdf [file appi.ps.201800510.ds001.pdf]

|                                                                                                                                                                                                                                                                                                                                             |                                                                                                                                                   |                                                                                                                   |                                                                                                                                                     |                                                                                                                                                            |                                                                                         |
|---------------------------------------------------------------------------------------------------------------------------------------------------------------------------------------------------------------------------------------------------------------------------------------------------------------------------------------------|---------------------------------------------------------------------------------------------------------------------------------------------------|-------------------------------------------------------------------------------------------------------------------|-----------------------------------------------------------------------------------------------------------------------------------------------------|------------------------------------------------------------------------------------------------------------------------------------------------------------|-----------------------------------------------------------------------------------------|
| 8:00                                                                                                                                                                                                                                                                                                                                        | Breakfast                                                                                                                                         |                                                                                                                   |                                                                                                                                                     |                                                                                                                                                            |                                                                                         |
|                                                                                                                                                                                                                                                                                                                                             | Introduction*                                                                                                                                     | Review*                                                                                                           | Personal Story••                                                                                                                                    | Personal Story••                                                                                                                                           | Personal Story••                                                                        |
|                                                                                                                                                                                                                                                                                                                                             | Pre-Assessment*<br><br>My New Friend*<br><br>Discussion Group- CIT, What Do You Remember?*<br><br>Group Presentation- CIT, What Do You Remember?* | CIT Principles**<br><br>Communication*<br><br>How to De-escalate-Basics❖<br><br>How to Lead De-escalation-Basics* | Your Second Class-Violence Precautions and Safety Planning••<br><br>Providing Feedback❖<br><br>Creating Scenarios❖<br><br>De-escalation Exercise 2* | Liberia Mental Health Policy❖❖<br><br>Rights of Persons With Disabilities❖❖<br><br>How to De-escalate-Advanced❖<br><br>How to Lead De-escalation-Advanced* | CIT Partners*<br><br>Partnering with Grant Hospital❖❖<br><br>Coordinating a CIT Course* |
| 12:00                                                                                                                                                                                                                                                                                                                                       | Lunch                                                                                                                                             |                                                                                                                   |                                                                                                                                                     |                                                                                                                                                            |                                                                                         |
|                                                                                                                                                                                                                                                                                                                                             | The Benefits of CIT**<br><br>How to Teach CIT•<br><br>Teaching Your First Class- Myths and Facts••                                                | De-escalation Exercise 1*<br><br>Suicide Precautions•<br><br>How to Share a Personal Story**                      | Psychological First Aid Talk 1❖<br><br>Psychological First Aid Talk 2•                                                                              | De-Escalation-Exercise 3*<br><br>Empathy Exercise**<br><br>The Role of the Law Enforcement Coordinator•                                                    | Review: CIT/ToT Material••<br><br>How to Administer Pre/Post-Assessment*                |
| 4:00                                                                                                                                                                                                                                                                                                                                        | Class Concludes                                                                                                                                   |                                                                                                                   |                                                                                                                                                     |                                                                                                                                                            | Graduation                                                                              |
| <p>* Classes are meant to be led by any facilitator.A8</p> <p>❖ Classes are meant to be led by LEO's .</p> <p>• Classes are meant to be led by MHC's.</p> <p>** Classes are meant to be led by Advocates/Service Users.</p> <p>❖❖ Classes are meant to be led by special guests.</p> <p>•• Classes are meant to be led by ToT Trainees.</p> |                                                                                                                                                   |                                                                                                                   |                                                                                                                                                     |                                                                                                                                                            |                                                                                         |
